# Supplementary material for: Nickel-titanium oxide as a novel anode material for rechargeable sodium-ion batteries
Source: Royal Society of Chemistry journal article supplement (doi:10.1039/c6ta07306a), 2016-01-01
Supplement: c6ta07306a1.pdf [file c6ta07306a1.pdf]

## Supporting Information

### Nickel-titanium Oxide as a Novel Anode Material for Rechargeable Sodium-ion Batteries

*Ramchandra S. Kalubarme,\* Akbar I. Inamdar, D. S. Bhange, Hyunsik Im, Suresh W. Gosavi, Chan-Jin Park\**

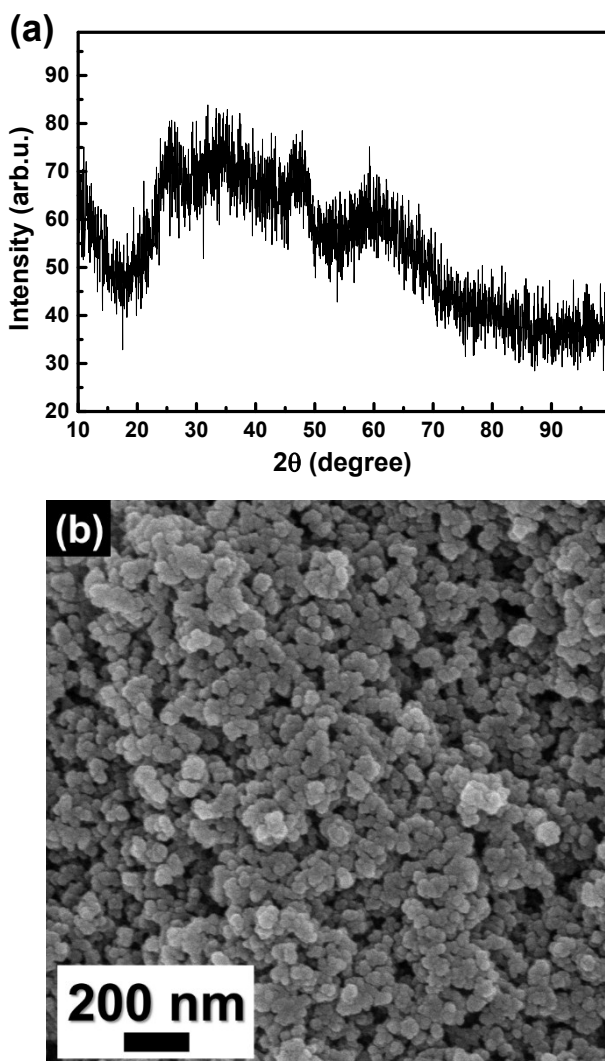

**Figure S1.** a) XRD pattern and b) FE-SEM image of as-prepared  $\text{NiTiO}_3$  powder samples that were synthesised through hydrothermal process.

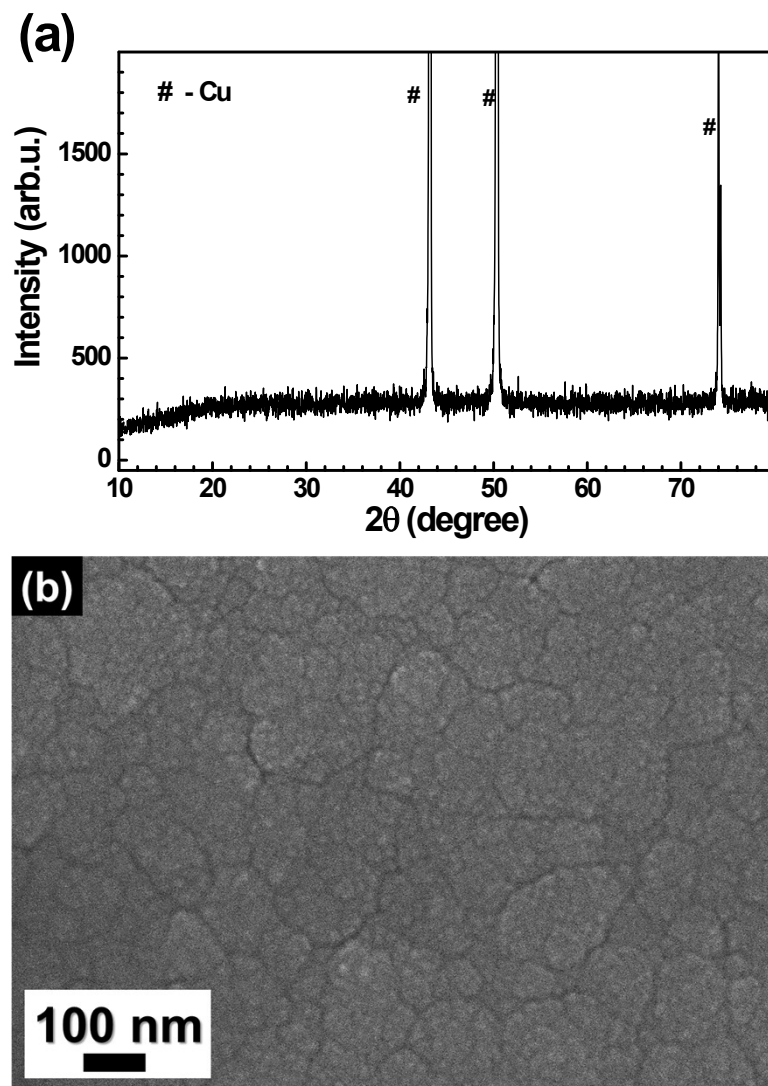

**Figure S2.** a) XRD pattern and b) FE-SEM image of sputter-deposited NTO thin films on Cu substrate.

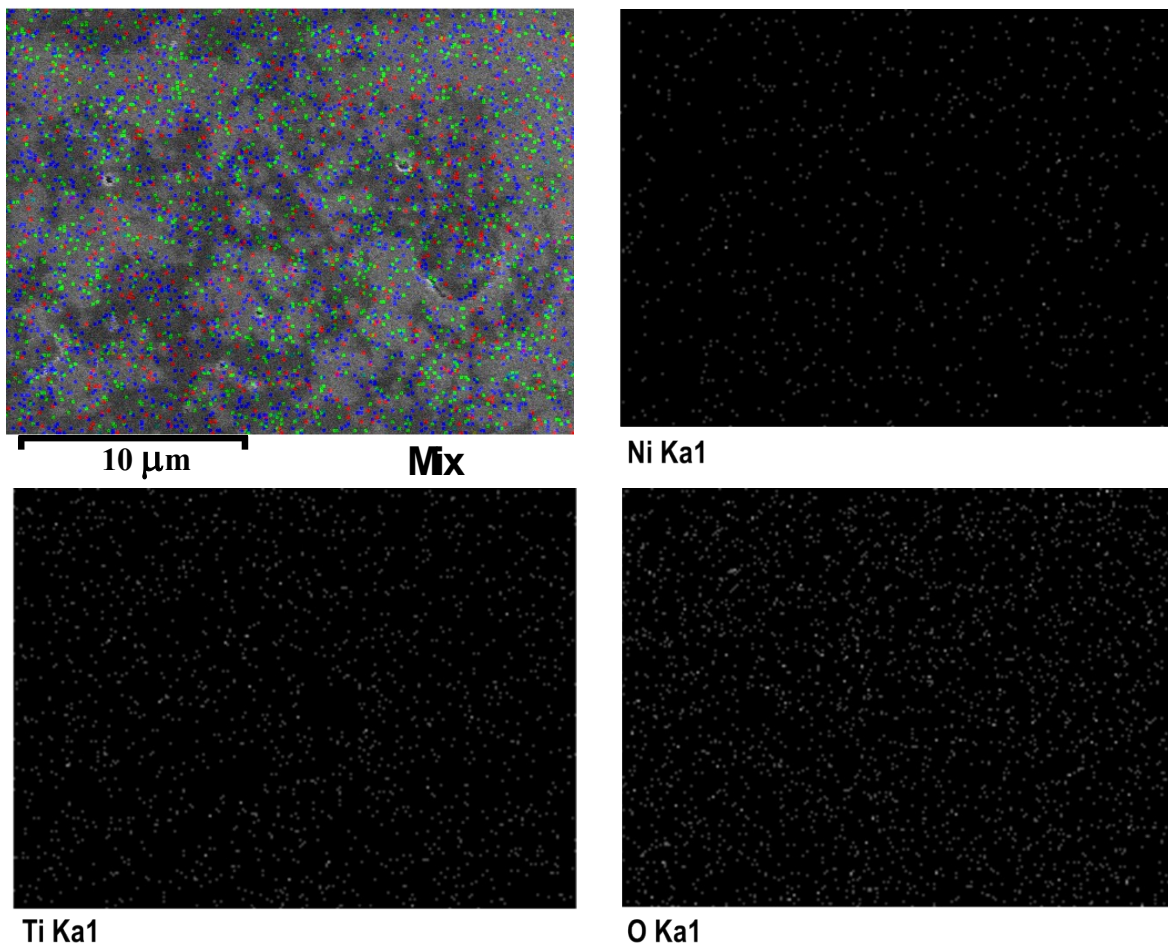

**Figure S3.** SEM-EDS elemental mapping of sputter-deposited NTO thin film.

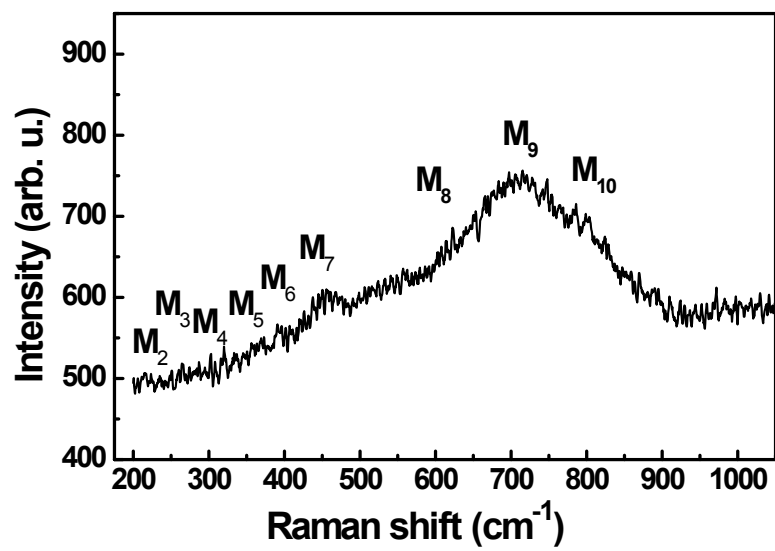

**Figure S4.** Raman spectra for the NTO thin film, sputter-deposited on Cu sheet.

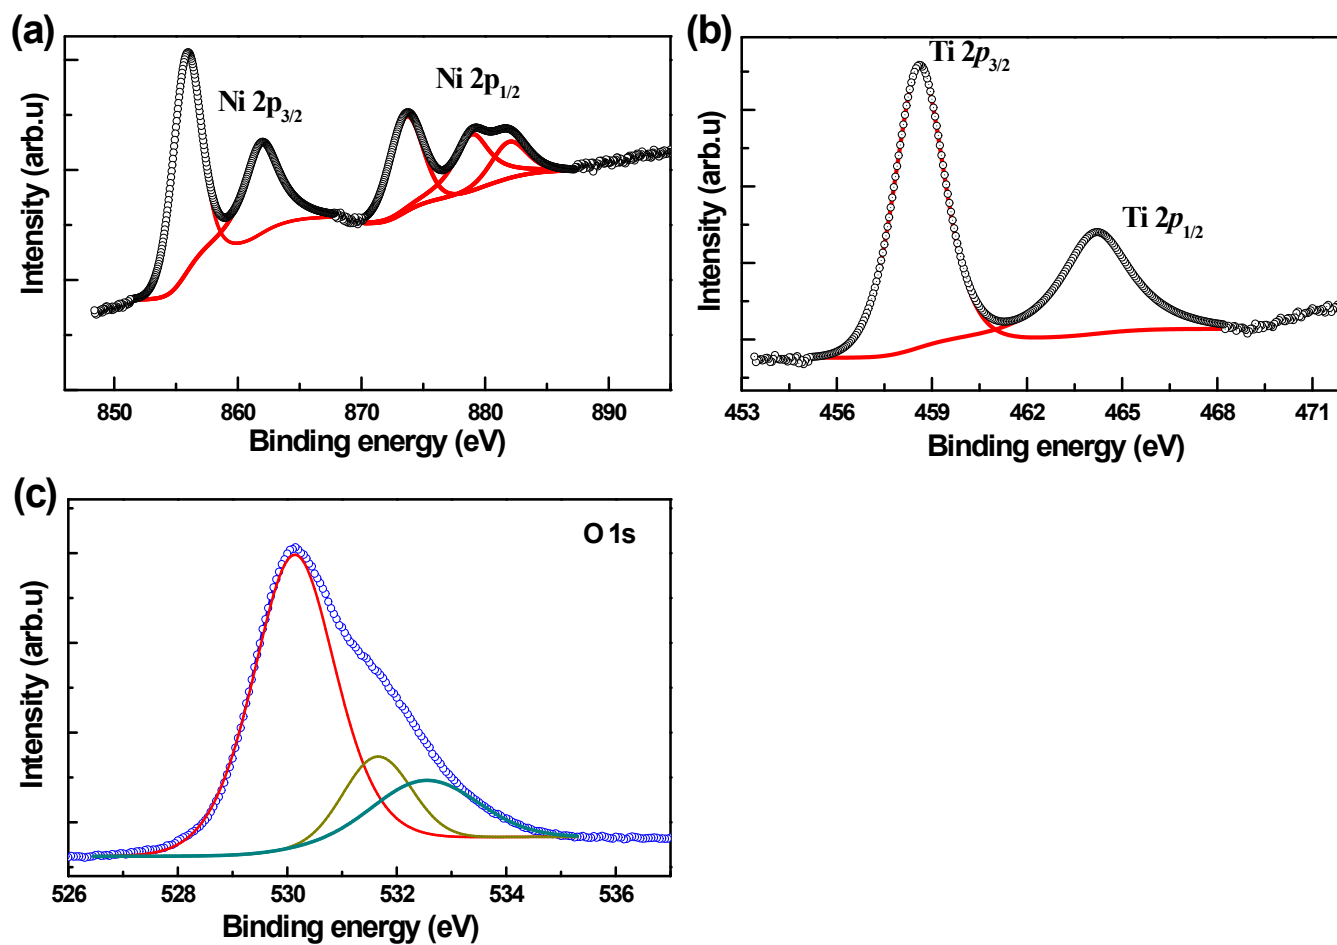

**Figure S5.** Core-level XPS spectra for: a) Ni 2p, b) Ti 2p, and c) O 1s in NTO thin film, sputter-deposited on Cu sheet.

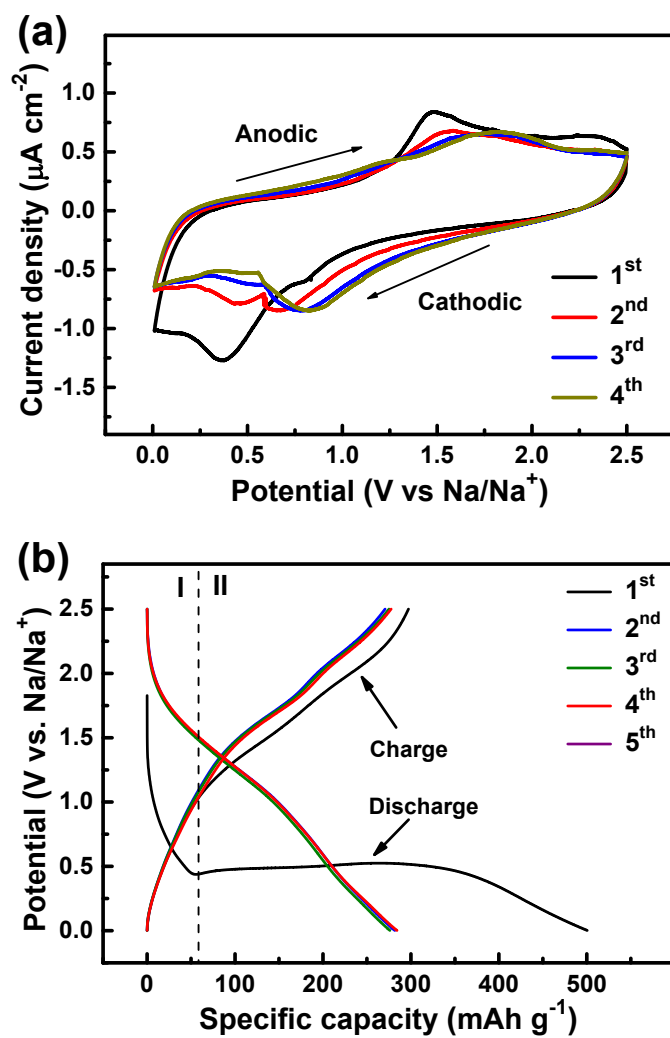

**Figure S6.** a) Cyclic voltammograms measured at  $0.1 \text{ mV s}^{-1}$  and b) charge-discharge-potential profiles at the specific current of  $50 \text{ mA g}^{-1}$  for the sputter-deposited NTO-thin-film electrode.



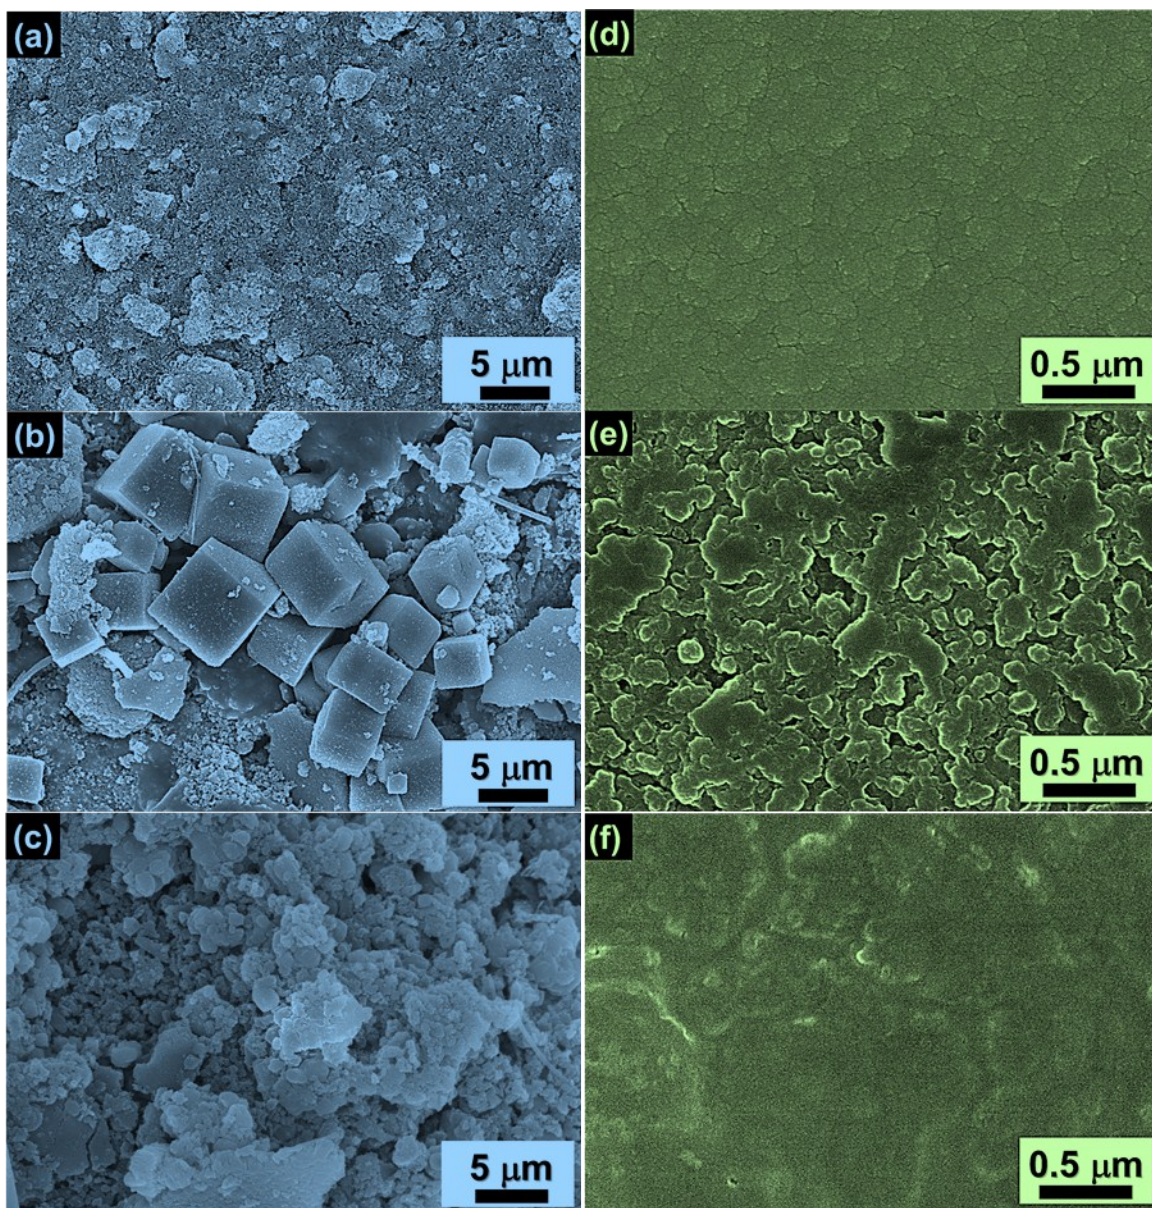

**Figure S7.** FE-SEM images of the: a-c) NTO-powder and d-f) thin-film electrodes. (a, d) pristine, (b, e) sodiated (after 1<sup>st</sup> discharge), and (c, f) desodiated (after 1<sup>st</sup> charge).

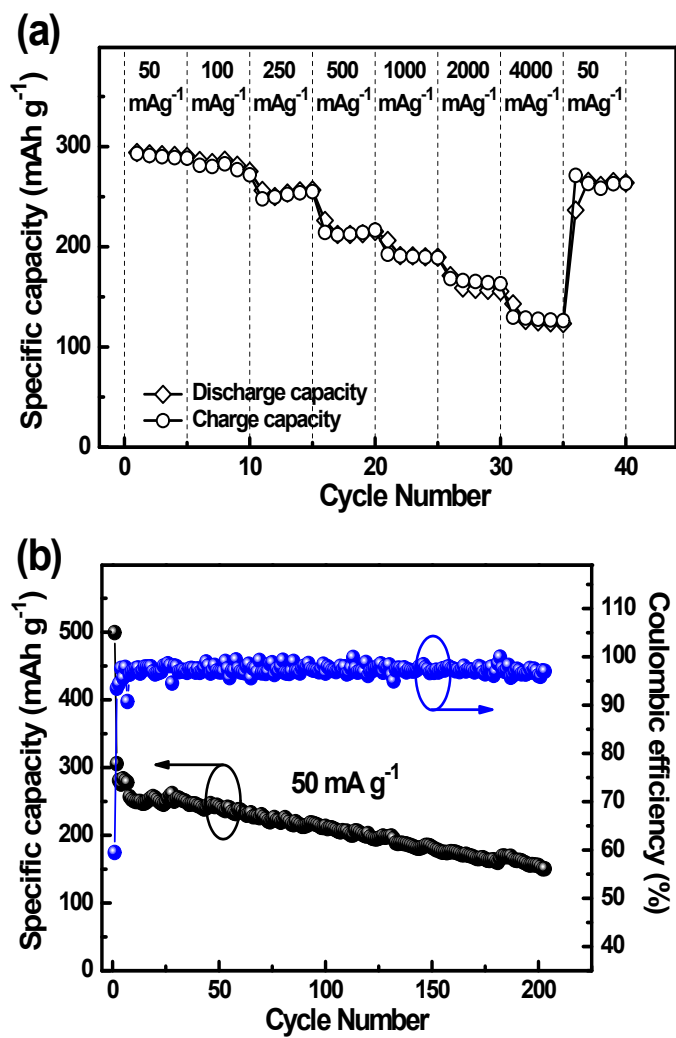

**Figure S8.** a) Rate capability and b) cyclability of the NTO-thin-film-based electrode.



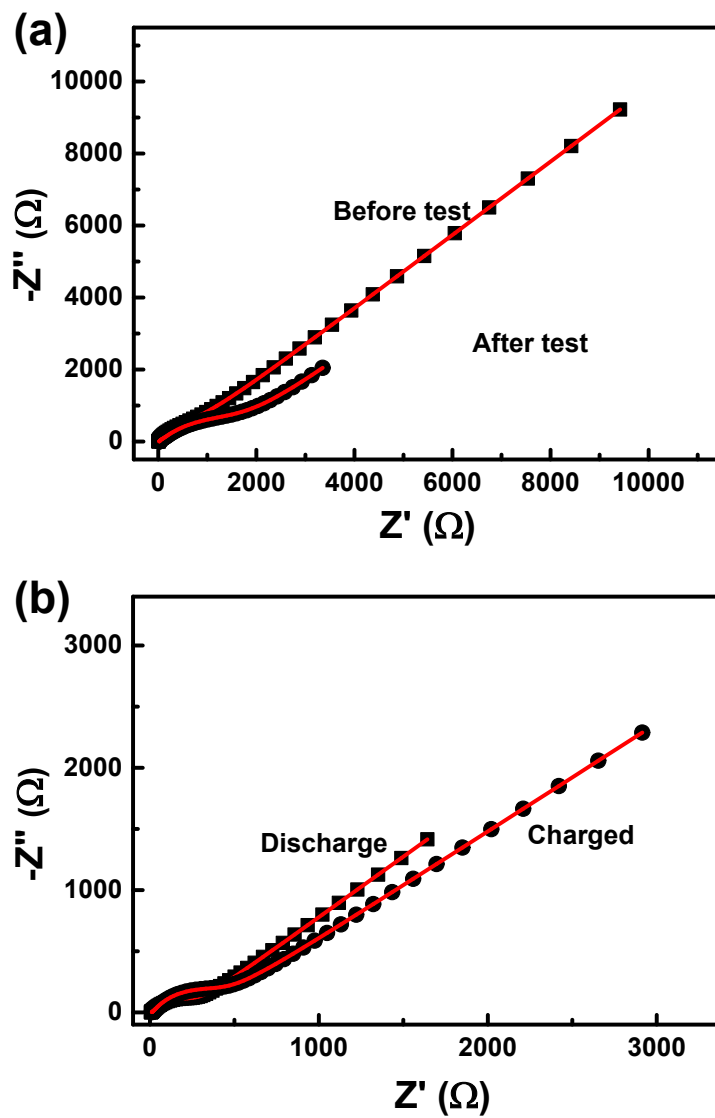

**Figure S9.** Nyquist-impedance spectra for the NTO-thin-film-based electrode: a) Before and after all discharge-charge tests, and b) after 1<sup>st</sup> discharge and 1<sup>st</sup> charge (symbols indicate the measured data, and lines indicate the simulated results).

**Table S1.** Electrolyte resistance ( $R_e$ ), film resistance ( $R_f$ ), and charge-transfer resistance ( $R_{ct}$ ) calculated from the Nyquist-impedance spectra that were recorded before, after, and during the charge-discharge tests for the NTO-thin-film electrode.

|                        | Before test | 1 <sup>st</sup> discharge | 1 <sup>st</sup> charge | After 200 cycles |
|------------------------|-------------|---------------------------|------------------------|------------------|
| $R_e$ ( $\Omega$ )     | 2.28        | 2.8                       | 9.47                   | 18.44            |
| $R_f$ ( $\Omega$ )     | 1030        | 9.48                      | 29.13                  | 49.5             |
| $R_{ct}$ ( $k\Omega$ ) | 165.7       | 0.342                     | 0.465                  | 1.407            |
| $Q_1$ ( $\mu F$ )      | 1.87        | 1.25                      | 3.21                   | 5.93             |
| $Q_2$ ( $\mu F$ )      | 0.313       | 0.111                     | 0.101                  | 0.727            |
